1 **Mesenchymal Stromal Cell Delivery via an Ex Vivo Bioreactor**  
2 **Preclinical Test System Attenuates Clot Formation for Intravascular**  
3 **Application**

4  
5 Brian O'Rourke<sup>1\*</sup>, Sunny Nguyen<sup>1\*</sup>, Arno W. Tilles<sup>1</sup>, James A. Bynum<sup>2</sup>, Andrew P Cap<sup>2</sup>, Biju  
6 Parekkadan<sup>1,3,4,5</sup>, Rita N. Barcia<sup>1</sup>

7

8 <sup>1</sup> Sentien Biotechnologies, Inc., Lexington, MA 02421 USA

9 <sup>2</sup> Blood and Coagulation Research Program, U.S. Army Institute of Surgical Research, Fort Sam  
10 Houston, Texas.

11 <sup>3</sup> Department of Surgery, Center for Surgery, Innovation, and Bioengineering, Massachusetts  
12 General Hospital, Harvard Medical School and Shriners Hospitals for Children, Boston,  
13 Massachusetts 02114, USA

14 <sup>4</sup> Harvard Stem Cell Institute, Cambridge, Massachusetts 02138, USA

15 <sup>5</sup> Department of Biomedical Engineering, Rutgers University, Piscataway, New Jersey 08854,  
16 USA

17

18 \* Equal contribution

19

20 Corresponding author: [rita.barcia@sentienbiotech.com](mailto:rita.barcia@sentienbiotech.com)

21

22

23 Key words: Mesenchymal stromal cells, *ex vivo*, clotting, heparin, clot formation time, perfusion,  
24 bioreactor, hypercoagulable, COVID-19, IBMR, instant blood-mediated inflammatory reaction

25

26

27

28

29 **Author Contributions**

30 Conceptualization, BOR, SN, AT, AC, JB, BP, RNB. Execution of Experiments, BOR, SN; Data  
31 Analysis and Review, BOR, SN, AT, AC, JB, RNB; Manuscript Preparation, BOR, SN, AT, AC,  
32 JB, BP, RNB; Funding Acquisition, BP, RNB.

33

34

## 35 **Abstract**

36 While mesenchymal stromal cells (MSCs) are an appealing therapeutic option for a range of clinical  
37 applications, their potential to induce clotting when used systemically remains a safety concern,  
38 particularly in hypercoagulable conditions, such as in patients with severe COVID-19, trauma, or cancers.  
39 Here, we tested a novel *ex vivo* approach aimed at improving the safety of MSC systemic administration  
40 by use of a bioreactor. In this device, MSCs are seeded on the outside of a hollow-fiber filter,  
41 sequestering them behind a hemocompatible membrane, while still maintaining cross talk with blood  
42 cells and circulating signaling molecules. The potential for these bioreactor MSCs to induce clots in  
43 coagulable plasma was compared against “free” MSCs, as a model of systemic administration, which  
44 were directly injected into the circuit. Our results showed that physical isolation of the MSCs via a  
45 bioreactor extends the time necessary for clot formation to occur when compared to “free” MSCs.  
46 Measurement of cell surface data indicates the presence of known clot inducing factors, namely tissue  
47 factor and phosphatidylserine. Results also showed that recovering cells and flushing the bioreactor  
48 prior to use further prolonged clot formation time. Further, application of this technology in two *in vivo*  
49 models did not require additional heparin to maintain target ACT levels relative to the acellular device.  
50 Taken together, the use of hollow fiber filters to house MSCs, if adopted clinically, could offer a novel  
51 method to control systemic MSC exposure and prolong clot formation time.

## 52 **Introduction**

53 Mesenchymal stromal cells (MSCs) are potent immunoregulators with strong preclinical data that  
54 support their application in a wide range of clinical conditions [1-4]. MSCs can provide therapeutic  
55 benefit to patients suffering from systemic inflammation by effectively immunomodulating peripheral  
56 blood cells to reduce inflammatory signaling and promote homeostasis. Significant evidence of these  
57 MSC derived effects have been shown *in vitro*, in animal models, and in clinical trials, including recently

58 under an emergency IND application or expanded access protocol with COVID-19 infected patients [5-  
59 10]. However, it is known that under certain conditions MSCs may be pro-coagulable and promote  
60 instant blood-mediated inflammatory reaction (IBMIR), likely through the expression of known  
61 coagulation factors on their cell surfaces and in the production of cellular microvesicles [11-14]. Two  
62 such factors, tissue factor and phosphatidylserine are known to be integral in physiological coagulation  
63 [15-18]. Phosphatidylserine is a major component of cell-based coagulation, enhancing coagulation  
64 activity through the charge-based binding of coagulation factor zymogens and cofactors to increase  
65 formation of the tenase and prothrombinase complexes [19-21]. This binding effectively enhances clot  
66 formation potential, exacerbating a response when a physiological trigger of coagulation, such as tissue  
67 factor, is present [18, 21, 22]. When MSCs are introduced into systemic circulation they bring with them  
68 the tissue factor expressed on their cell surface. MSCs sourced from different donors and locations  
69 (bone marrow, BM-MSCs, adipose-derived, AD-MSCs, umbilical cord, UC-MSCs) vary in tissue factor  
70 expression, with higher levels of tissue factor correlating with quicker clot formation and IBMR. BM-  
71 MSCs, the most commonly used, have been widely shown to have the least tissue factor expression [16,  
72 18].

73 Reducing potential MSC driven clot formation has been a major focus for both academic and clinical  
74 groups over the last decade. Advances have been made to mitigate these risks including changing the  
75 MSC mode of delivery away from systemic exposure via intravenous (IV) infusion towards localized  
76 injection. However, in some cases, systemic IV infusions could provide the highest therapeutic potential.  
77 Minimizing clot formation potential could improve therapeutic efficacy, and also increase safety of the  
78 treatment in hypercoagulable patients such as patients with COVID-19 in the ICU [23-26]. To that end,  
79 increasingly rigorous release criteria during MSC clinical manufacturing are now being applied. Cell  
80 populations with low tissue factor are being selected and 'fresh' or recovered MSCs with lower surface  
81 phosphatidylserine exposure are preferred [17, 27]. Additional clot mitigation approaches are being

82 evaluated, including shifting delivery of the MSCs from intravenous to intramuscular administration,  
83 emphasizing higher cell viability, or even using gene modification to promote cell survival [28-31].

84 We propose an alternative approach which would minimize direct exposure of the MSCs to blood and  
85 contain MSCs in one location. We utilized a recently described perfusion platform that incorporates a  
86 hollow-fiber filter into a fluid circuit to compartmentalize the MSCs, while still allowing exchange of  
87 signaling molecules from perfusate to cells, and vice-versa [32]. MSCs within this platform were shown  
88 to effectively retain their immunomodulatory capacity and alter perfused lymphocyte proliferation,  
89 activation, and cytokine production in an MSC dose and duration exposure dependent manner, despite  
90 having minimal direct contact with the blood cells.

91 Benchtop coagulation assays, including microfluidic setups, are becoming increasingly translationally  
92 relevant[33]. Here, we used a MSC bioreactor platform to assay whether limiting the direct exposure of  
93 fresh frozen pooled plasma from healthy patients to MSCs, and therefore the available tissue factor and  
94 phosphatidylserine of the MSCs, would affect clot formation time (CFT) in a modified plasma-based clot  
95 formation assay [34, 35]. Plasma was perfused through bioreactors seeded with MSCs as well as through  
96 circuits in which cells were directly injected into the perfused plasma to make comparative CFT  
97 measurements. We were able to show that bioreactor use significantly prolonged CFT relative to direct  
98 injection of the MSCs. Flushing of concentrated soluble factors from bioreactors further contributed to  
99 prolonged CFTs. Lastly, the previously proposed clinical solution for MSC driven clot formation,  
100 anticoagulation with heparin [36-39], was shown to be effective in both perfusion setups. These results  
101 suggest this new modality for systemic MSC delivery may offer a safer alternative to intravenous MSC  
102 injection. The clinically scaled ex vivo engineered MSC delivery is currently undergoing testing in a Phase  
103 I/II trial in acute kidney injury (AKI) and COVID-19 associated AKI.

## 105 **Materials and Methods**

### 106 MSC Cell Source and Culture Processes

107 Human bone marrow derived mesenchymal stromal cells were isolated from 3 separate donors. Cells  
108 were cultured and propagated either in-house using proprietary techniques at developed Sentien  
109 Biotechnologies (MA, USA) or RoosterBio (MD, USA) and cryopreserved at early passage (P3-P5). Cells  
110 were cultured using 2D planar growth conditions. Cells from Sentien Biotechnologies were cultured in  
111 aMEM media (HyClone, UT, USA, SH3A5195) containing FGF and FBS, while Roosterbio cells were  
112 expanded in xeno-free RoosterNourish-MSC-CC media (RoosterBio, MD, USA, KT-021). All human  
113 samples were obtained from commercial vendors under a consented protocol for research purposes  
114 only.

### 115 MSC Direct Injection

116 MSCs were thawed from cryopreservation into citrated fresh-frozen pooled plasma (FFPP) (George King  
117 Bio-Medical, KS, USA) and counted via Trypan Blue exclusion. Each direct injection subgroup was  
118 processed individually and subgroups were never combined. The fresh thawed direct injection subgroup  
119 was placed into plasma after counting and directly injected for perfusion (Figure 2). The recovered direct  
120 injection subgroup allowed for 24 hours of recovery on a cell culture dish, followed by dissociation with  
121 TryPLE, counting via Trypan Blue exclusion, and placing into plasma prior to direct injection. Cells for use  
122 in washed groups were washed with saline directly after thaw, pelleted and resuspended in fresh  
123 citrated media prior to direct injection.

124

### 125 Bioreactor Fill/Finish

126 MSCs were thawed from cryopreservation into aMEM supplemented with 10% HSA and counted via  
127 Trypan Blue exclusion prior to seeding in device. The desired cell number was suspended into 9 mL of  
128 aMEM and then seeded into saline-primed microreactors (Spectrum Laboratories, CA, USA; C02-P20U-  
129 05) with 0, 1, or  $3 \times 10^6$  viable cells per device (0M, 1M, 3M, respectively). Excess media flowed through  
130 the semi-permeable hollow fibers while cells remained within the extraluminal space of the reactor.  
131 Microreactors used were 20 cm long with an internal surface area of  $28 \text{ cm}^2$ . Within each microreactor  
132 are nine 0.5 mm diameter fibers comprised of polyethersulfone with a  $0.2 \text{ }\mu\text{m}$  pore size. The total  
133 internal volume of the microreactor is 1.5 mL.

134 Depending on the group, microreactors were either used immediately or incubated at  $37^\circ\text{C}$  for 2 hours  
135 to allow for cell attachment and were subsequently held for 24 hours at room temperature prior to  
136 integration into the circuit. This hold time intends to mimic the time between device manufacture and  
137 potential clinical application.

138 Following hold, select MRs were subjected to flushing. Prior to connection to the perfusion circuit sterile  
139 saline (4.5 mL) was pushed via syringe through the extracapillary port of the MR. Discharge exited  
140 through the intracapillary port.. Samples from the extracapillary space were collected prior to and post  
141 flush to measure soluble levels of phosphatidylserine and tissue factor.

142 Large scale bioreactors were used in the animal studies. Similar to the microreactor fill/finish process,  
143 following MSC thaw, cell and media suspension was perfused through the extracapillary port onto semi-  
144 permeable hollow fibers (Asahi Kasei Medical Inc, IL, USA, OP-05W(A). Cells remained within the  
145 extraluminal space of the reactor while excess media perfused through the membranes out the  
146 intracapillary port. Thawed vials used in these assays were comprised of cells with a minimum 80%  
147 viability. Bioreactors were seeded with either 0, 250, or  $750 \times 10^6$  viable cells per unit.

148

149 Fresh-Frozen Pooled Plasma

150 Fresh-Frozen Pooled Plasma was collected and citrated via FDA licensed blood centers from prescreened  
151 healthy donors (Geroge King Bio-Medical, KS, USA). No buffers or stabilizers were added. Plasma was  
152 frozen within 30 minutes of collection at -70°C from a pool of >50 donors per lot. This plasma still  
153 contains many essential factors for clot initiation, including prothrombin which can be activated with the  
154 addition of calcium via CaCl<sub>2</sub> to form firm clots over time. Testing was done to ensure normal values for  
155 PT, aPTT, fibrinogen, dRVVT normalized ratio, Factors II, V, VII, VIII, IX, X, XI, and XII.

156

157 Plasma Perfusion

158 After thawing 5 mL of FFPP via water bath (37°C), 50 uL of 1M CaCl<sub>2</sub> was added to the plasma within a  
159 capped syringe and inverted. The plasma was loaded into prepared perfusion circuits with (0, 1, and  
160 3×10<sup>6</sup> MSCs) and without microreactors via the syringe port and perfused at a flow rate of 1 mL/min for  
161 5 minutes. Plasma was then extracted from the circuit via the syringe port, aliquoted into microplate  
162 wells and placed within the spectrophotometer (Synergy Mx, BioTek) for reading at 405 nm every 10  
163 seconds for a total of 45 minutes.

164 Positive controls of Innovin (Siemens Healthcare Diagnostics, Germany) or Factor IXa (Haematologic  
165 Technologies, VT, USA) were used separately, where designated, at 1:50,000. These positive controls  
166 were added prior to CaCl<sub>2</sub> addition to ensure equal mixing before coagulation initiation. 1M CaCl<sub>2</sub> was  
167 added at 1:100.

168 Unfractionated heparin (Grifols, Spain) was used at 1.5 U/mL in the designated groups. Heparin was  
169 added prior to CaCl<sub>2</sub> addition to ensure equal mixing before coagulation initiation.

170

171 Clot Formation Time Analysis and Graphing

172 Clot formation time measurements incorporated the sum of two time periods. The first period initiates  
173 when plasma has been recalcified through the addition of CaCl<sub>2</sub> and continues through perfusion until  
174 transfer of the samples into microwells for analysis on the spectrophotometer. This value is immediately  
175 recorded by the operator. The second time period occurs when the spectrophotometric readings begin  
176 and continues for 45 minutes. At the completion of the study the elapsed time in the first period is  
177 added to the time required to obtain the ½ maximal spectrophotometric value, as determined using the  
178 clot formation time formula. Combined, these measurements capture the clot formation time.

179 Resulting values were then graphed and statistically analyzed using unpair student's t-test (GraphPad  
180 Software, La Jolla, CA). Results are presented as mean ± standard deviation. Values of p < 0.05 were  
181 considered statistically significant for all analyses.

182

183 Flow cytometry

184 To measure tissue factor by flow cytometry, staining was done using CD142-APC monoclonal antibody  
185 (eBiosciences) in a total volume of 100 µL Stain Buffer containing FBS and ≤0.09% sodium azide (BD  
186 Biosciences). Samples were incubated for 15 min at 4°C and analyzed on a FACSCanto II flow cytometer  
187 (BD Biosciences) using BD FACSDiva v6.1.1 software. Mouse PE IgG1 kappa isotype antibody  
188 (eBioscience) was used as a negative control.

189 Annexin V staining was done using the FITC Annexin V Apoptosis Detection Kit (BioLegend) according to  
190 the manufacturer's instructions. Fresh thawed MSCs were used to optimize fluorescence compensation.

191 Flow cytometry analysis was performed in FlowJo (FlowJo LCC, OR, USA; version 10.7).

192



193 Mongrel Dog Perfusion

194 Eighteen male mongrel dogs were randomized onto the study and underwent surgery for placement of  
195 a dialysis catheter (Toxikon Corp, Bedford MA). Animals received buprenorphine (0.01 mg/kg, IM) pre-  
196 surgery, PM the day of surgery and AM the day after surgery, and cefazolin (22 mg/kg, IV/IM) pre-  
197 surgery, then daily for two additional days post-surgery. After a 2 day wash out period, animals were  
198 dosed according to their group assignment with 6 animals assigned to either a 0M, 250M, or 750M MSC  
199 dose group. Heparin was administered throughout treatment with all animals first receiving a bolus of  
200 heparin at 150 U/kg and then a continuous infusion of 25 U/kg every hour. All animals underwent a 24-  
201 hour perfusion (+/- 1 hour), with the exception of animal 1003 (Group 1, Control) which was stopped  
202 after 22 hours due to low blood flow rate through the catheter.

203

204 Porcine Acute Myocardial Infarction Model Perfusion

205 On Day 0, 8 Yorkshire pigs underwent induced myocardial infarction of the anterior/septal left ventricle  
206 by 45-minute occlusion of the left anterior descending artery (CBSset Inc., Lexington, MA). After one hour  
207 of reperfusion/stabilization, animals were connected to the extracorporeal loop via the jugular vein  
208 which enabled whole blood circulation through a large scale bioreactor for a period of up to 12 hours.  
209 Bioreactors were seeded with either 0 or 750 million human bone-marrow derived MSCs, 24 hours prior  
210 to perfusion (n=4 per group). Heparin was administered throughout the treatment, first as a bolus of  
211 225 U/kg and then intermittently to ensure ACTs remained above 300 seconds. Serum troponin levels  
212 were assessed at baseline 12 and 24 hours after infarction induction. At 72 hours post injury induction  
213 animals were sacrificed with their hearts excised and dyed with Evans Blue and 1% TTC. Infarct area was  
214 determined through tracing of digitized images of section via the morphometric software system  
215 Olympus cellSens (Version 1.17).

216

## 217 **Results**

### 218 Development of an assay to test CFT under perfusion

219 We developed an approach in which we could test human plasma compatibility of allogeneic MSCs  
220 across multiple extents of cell exposure. Cryopreserved MSCs could either be injected into the plasma  
221 directly after thaw (**Fig. 1A**), cultured for 24 hours after recovery and then directly injected into plasma  
222 (**Fig. 1B**), or seeded into hollow-fiber microreactors with a semi-permeable membrane, allowed to  
223 attach, and held for up to 24 hours before being subjected to perfusion (**Fig. 1C**). These ranges of  
224 administration broadly represent many of the systemic administration options available today and allow  
225 the comparison of varying degrees of MSC to plasma exposure and the effects of MSC culture  
226 conditions.

227 After perfusion, plasma was collected from the circuit via the syringe port and placed into microwells for  
228 spectrophotometric reading over time. The point at which a clot was formed was determined by using  
229 the resultant spectrophotometric readout and formula (**Fig. 1D, E**) to calculate the  $\frac{1}{2}$  maximal value, a  
230 point previously determined to designate clot formation [34, 35]. Higher values for clot formation times  
231 indicate slower clot formation within the plasma.

232

### 233 Presence of MSCs accelerates CFT

234 Consistent with previous work [12], our fresh-frozen pooled plasma-based (FFPP) clot formation assay  
235 showed that the presence of MSCs accelerated clot formation under flow conditions relative to acellular  
236 controls (**Figure 2**). Interestingly, the same experimental setup run with plasma isolated from an

237 individual donor 24 hours after collection instead of FFPP did not result in significantly different clotting  
238 times between cellular and acellular groups, likely as it wasn't frozen directly after being pulled (**Figure**  
239 **S1**). Spectrophotometric measurements of optical density at 405 nm captured fibrin clot formation as it  
240 occurred within the microwell via increases in measured OD over time (**Figure 2A**). Results from our  
241 assays showed that the direct injection (DI) of freshly thawed MSCs into the plasma flow circuit  
242 significantly hastened the onset of clot formation when compared to circuits using bioreactor housed  
243 MSCs. Both the 1M BM-MSc and 3M BM-MSc direct injection groups induced clot formation during the  
244 initial perfusion, prior to spectrophotometric reading. All other groups completed perfusion and  
245 spectrophotometric reading (**Figure 2B**). These findings were consistent across 3 separate MSC donors  
246 (**Figure S2**).

247 Furthermore, MSC dose played a role in clot formation. Increases in the number of cells administered  
248 were significantly associated with shorter CFTs across both administration routes. However, when  
249 comparing similarly seeded MRs to direct injection with the same number of cells, CFT was significantly  
250 slower in the groups where MSCs were housed in the bioreactor (**Figure 2B**).

251

#### 252 Recovering thawed MSCs prolongs CFT

253 Immobilizing MSCs in the bioreactor allows for cell recovery post-thaw, a process proposed to reduce  
254 the surface exposure of pro-coagulation factors [27]. In order to investigate the effect of recovering  
255 MSCs on clot formation, two known pro-coagulant factors- tissue factor and phosphatidylserine - were  
256 measured prior to perfusion. Flow cytometric analysis of the surface markers on both the freshly thawed  
257 and MSCs allowed to recover for 24 hours in culture, showed that cell recovery had significantly lowered  
258 the levels of phosphatidylserine and tissue factor (**Figure 3A**).

259 We next asked whether recovering MSCs post thaw had an effect on clot formation. CFTs were  
260 compared between freshly thawed cells (unwashed or washed) and cells recovered for 24 hours. Both  
261 unwashed and washed freshly thawed conditions quickly clotted at similar times during perfusion  
262 suggesting that washing to remove debris and cryopreservative did not affect clot time. However, CFT  
263 was significantly prolonged by allowing for 24 hours of recovery in culture prior to injection (**Figure 3B**).

264 As levels of MSC surface markers appeared to be correlated with clot initiation, we next asked whether  
265 limiting the direct interaction of MSC surface markers and plasma could reduce the rate of clot  
266 formation. Interestingly, recovery of MSCs within a microreactor did not significantly affect measured  
267 CFTs relative to fully recovered MSCs (**Figure 3B**). MSCs that were thawed, seeded into MRs, and  
268 immediately perfused, clotted at the same time as MSCs that were seeded and allowed to recover for 24  
269 hours. These results suggest that though recovery of cells post thaw significantly reduces MSC induced  
270 clotting, housing them in an adherent state on the outside of a hollow fiber seems to further, and more  
271 significantly, reduce their clotting potential even without any recovery period.

272

#### 273 Removing soluble factors from the MSC reactor prolongs CFT

274 While seeding MSCs on the hollow fiber membrane resulted in prolonged CFT, cellular contribution was  
275 still observed as all cellular microreactor circuits clotted in a dose dependent manner (**Figure 2B**). While  
276 in the 24-hour hold period post-attachment, it is likely that MSC derived factors accumulate within the  
277 microreactor and may contribute towards clotting. To directly assay this, we integrated a saline flush of  
278 the microreactor into our protocol. After the 24-hour hold and just prior to perfusion, MRs were flushed  
279 with 3X column volume (4.5 mL) of saline. Samples from the microreactor were collected pre-and post-  
280 flush and subjected to flow cytometric analysis for measurement of tissue factor and  
281 phosphatidylserine. Pre-flush samples showed higher levels of phosphatidylserine and tissue factor in

282 the cellular group as expected. Post-flush samples showed clear reductions in both factors,  
283 demonstrating that soluble factors can be effectively flushed out of the hollow fiber filter (**Figure 4A**).  
284 Flushing the microreactors significantly prolonged CFT in higher doses (3M), while in lower doses (1M)  
285 significance could not be reached. (**Figure 4B**). These data indicate that soluble factors (e.g.  
286 phosphatidylserine) are present in the extracapillary space of the bioreactor and can accumulate to  
287 contribute to accelerated clot formation.

288

#### 289 Heparin administration prevents MSC induced clotting *in vitro*

290 Despite significantly reducing the clotting potential of MSCs, bioreactors loaded with the cells at higher  
291 doses (3M) still induced earlier clotting when compared to acellular or low-dose (1M) cell bioreactors.  
292 Plasma spiked with heparin was used to investigate the potential efficacy of administered  
293 anticoagulation in preventing clot formation within the circuitry. Administration of 1.5 U/mL of heparin  
294 across all groups was able to completely prevent clot formation, even in the presence of positive control  
295 Innovin or 3M directly injected MSCs (**Figure 5**).

296

297

#### 298 Heparin prevents MSC induced clotting *in vivo*

299 The bioreactor setup can be scaled up with larger filters to allow for perfusion in large animal models.  
300 Previous work in *in vivo* models showed that heparin administration could effectively reduce  
301 procoagulant activity of MSCs [35]. To reduce the number of animals used, here we compared only  
302 between bioreactor groups, no direct injection animal studies were conducted. We first tested feasibility  
303 of perfusion of the device *in vivo* in a healthy canine model. Animals were all heparinized to assure  
304 safety as extracorporeal treatments (even without cells) have intrinsic clotting potential. Dogs were

305 grouped into cohorts based on the number of MSCs loaded into a scaled up bioreactor, with doses of 0  
306 million, 250 million, and 750 million (n=6 dogs per group) and perfused for 24 hours. No clotting was  
307 seen in any group (data not shown).

308 Next, we asked the question of whether clotting in vivo would be observed under an pathological  
309 conditions, such as acute organ failure, where systemic inflammation may perturb the coagulation  
310 pathways. For this purpose a porcine animal model of acute myocardial infarction (AMI) was used  
311 (**Figure 6 A**). AMI was induced, animals were re-perfused/stabilized for 1 hour and then connected to  
312 the bioreactor perfusion circuit for 12 hours. All animals were perfused without events for 12 hours,  
313 with each group showing cardiac injury biomarker induction (**Figure 6 B**) and similar infarct size (**Figure 6**  
314 **C**). Heparin was administered throughout the perfusion process to maintain a minimum activated  
315 clotting time (ACT) of at least 300 seconds (as mandated by IACUC), with neither group requiring  
316 significantly more heparin than the other (**Figure 6 D, E**). These data support the use of MSC bioreactors  
317 without additional heparin requirements beyond what is used in acellular extracorporeal treatments.

318

## 319 **Discussion**

320 In the absence of clear clinical benefit of early allogeneic MSC human trials to meet their therapeutic  
321 endpoints, there has been a major focus in recent years to improve the reliability and consistency of the  
322 therapeutic cells delivered [40]. Improvements in manufacturing processes, more stringent release  
323 testing and biobanking has provided a reproducibility to the cell production that has contributed to a  
324 clinically approved therapy [8, 28, 41-43]. However, many cellular concerns still exist, including handling  
325 at point of care, thawing, route of delivery, hemocompatibility, and dosing. Our studies here focused on  
326 comparing the potential risks of one of those concerns, MSC induced coagulation, between direct  
327 infusion and a modified ex vivo, systemic approach.

328 Most commonly, allogeneic MSCs are delivered for therapeutic effect through systemic administration  
329 (intravenous or intra-arterial) accounting for about half of all published studies [28]. Systemic  
330 introduction has been described as the least invasive, most reproducible, and provides the MSCs the  
331 most direct access to modulate systemic inflammation [44]. However, this route of administration may  
332 increase risks to certain hypercoagulable patients given that MSCs are known to express coagulation  
333 factors both on their cell surface and on the exosomes and vesicles they secrete, namely tissue factor  
334 and phosphatidylserine [16, 41, 45]. Further, systemically introduced MSCs can rapidly get trapped in  
335 the lungs or be cleared, reducing their potential efficacy [40]. Because of these concerns, where possible  
336 and concordant with the mechanism of action (MoA), alternatives to systemic administration are  
337 increasingly utilized, including intramuscular infusions, topical, direct tissue injections, and intracoronary  
338 delivery. While useful for localized applications including tissue regeneration, these routes of delivery  
339 are not used to treat systemic applications such as GvHD, and present limitations of their own in terms  
340 of feasibility, reproducibility, and efficacy [46, 47].

341 Here, in concert with the previously mentioned improvements with cellular production, we assayed the  
342 value of incorporating an experimental setup which confines MSCs behind the membrane of a hollow-  
343 fiber filter. Given that much of the MSCs' ability to induce clot formation arises from its cell surface  
344 markers and secreted vesicles, we considered that the confinement of the cells and their procoagulant  
345 expressing surface markers in one extraluminal location may reduce the rate at which clot formation  
346 occurs. We used an existing bioreactor platform known to retain MSC immunomodulatory capacity in  
347 combination with modifications to an existing clot formation assay to assess cellular effect on CFT in this  
348 immobilized state relative to direct injection [32, 34, 35]. Through this platform we perfused citrated,  
349 platelet poor fresh-frozen pooled plasma. This plasma contains many essential factors for clot initiation,  
350 including prothrombin which can be activated with the addition of calcium via  $\text{CaCl}_2$  to form firm clots  
351 over time.

352 Immediately after CaCl<sub>2</sub> addition, this coagulable (but still liquid) plasma is perfused through the hollow-  
353 fiber filter platform. As expected, direct injection of MSCs into the coagulable plasma perfusion circuit  
354 led to rapid clot formation in a dose-dependent manner. Interestingly, perfusion of coagulable plasma  
355 through bioreactors seeded with MSCs resulted in clotting at rates significantly slower than their  
356 comparable direct injection groups, suggesting that free, circulating MSCs increase thrombosis risk more  
357 than bioreactor immobilized MSCs. Like the direct injection group, the MSC dose seeded in the  
358 bioreactor was predictive of CFT with higher doses inducing quicker clots, likely through the increased  
359 production of pro-coagulable MSC factors. It is also important to note that the presence of a filter  
360 (acellular microreactor) in the circuit induced clotting faster than a circuit without a microreactor  
361 supporting the idea that high surface area biomaterials increase factor adsorption and may contribute  
362 to expedited clotting [48]. Alternative approaches such as heparin coating the hollow fiber filters prior  
363 to MSC seeding may reduce surface adsorption and adhesion, lowering this inherent clot induction  
364 potential [49-51].

365 Historically, failed MSCs trials have been in part attributed to poor cell processing, including delivery of  
366 dead and/or coagulable cells [40, 43, 52, 53]. In this study, washing of cells post thaw did not affect CFT  
367 significantly. However, recovery of cells for 24 hours post thaw did reduce clot formation potential. This  
368 was shown to correlate with surface marker expression of tissue factor and phosphatidylserine. Both  
369 decreased following recovery, correlating with a slower clot formation time relative to MSCs directly  
370 injected into the circuit post thaw. Recovery culture of cryopreserved MSCs within a microreactor did  
371 not have a significant impact on CFT relative to freshly thawed cells within microreactors, suggesting  
372 that the MSC confinement by the hollow fiber membrane may actually be playing a role in prolonging  
373 CFT. While MSCs located behind the membrane are still able to exchange their immunomodulatory  
374 secreted factors with perfusing solutions, they may be sharing less of their cell surface area and may aid



375 in confining their cellular debris to the extracapillary space of the microreactor. Future studies with  
376 more restrictive filter sizes may even further limit MSC exposure and further prolong CFT.

377 Having shown that cell presence shortens clot formation time we sought to use the platform to mitigate  
378 that effect as much as possible. Since our microreactor is composed of hollow fibers, exchange does  
379 happen through the 0.2  $\mu\text{m}$  pores on the fibers in the microreactor. During hold, MSCs continue to  
380 produce materials and some of this accumulated material could be contributing to clot formation. To  
381 assess this, we developed a flush protocol and measured steep drops in known coagulation markers.  
382 Consequently, flushing resulted in slower CFTs at higher MSC doses. Future studies will assay whether  
383 flushing also affects immunomodulatory potential relative to unflushed reactors [32].

384 Despite the microreactors measured effect of prolonging CFT, it did not completely abrogate the cellular  
385 contribution to shortened CFT. In clinical setting anticoagulation protocols will likely be integrated to  
386 ensure designated perfusion times are met. Our *in vitro* experiments and *in vivo* canine studies showed  
387 that heparin administration could effectively prevent any cellular induced clot formation during  
388 perfusion. However, many of the patients suffering from systemic inflammation, including those with  
389 COVID-19, present with hypercoagulable plasma that will require anticoagulation prior to MSC  
390 administration. Our pig model represented a more physiologically relevant condition in which inflamed  
391 animals were perfused with a device scaled for human use. Under these acute injury conditions, no  
392 clotting was observed in animals perfused with devices loaded with 750M MSCs and for 12 hours. The  
393 lack of additional heparin requirement suggests that patients set to undergo MSC-bioreactor perfusion  
394 may not need more heparin than a sham control undergoing the same procedure. Future studies  
395 comparing direct infusion of MSCs to bioreactor housed MSCs would be useful to evaluate both for  
396 coagulation and efficacy responses.

397 Given the slower CFT in the microreactor groups relative to the direct injection groups, it is possible that  
398 a lower dose of heparin could be administered to the microreactor groups. Future dose testing will be  
399 required to verify this. Such a finding would be clinically relevant, as reduction in the amount of heparin  
400 required to be delivered to critically ill patients may help prevent unintended health consequences.  
401 Further, patients which are medically restricted from systemic heparin administration for risk of internal  
402 bleeding could potentially be anticoagulated regionally with citrate. Citrate could be introduced and  
403 equilibrated within the MSC bioreactor circuit, allowing MSC factors to be released but without exposing  
404 patients to the anticoagulant [54].

405 In the unfortunate circumstances of the COVID-19 pandemic, interest in MSC based therapies has  
406 increased markedly. Case reports, first from China and then worldwide, showed promising  
407 improvements in patient health following intravenous MSC infusion, even in severely ill patients [10, 55,  
408 56]. While larger studies are now needed to more completely support these findings, it is clear that  
409 intravenous infusion of MSCs for systemic inflammatory conditions such as COVID-19 infection or GvHD  
410 continues to have therapeutic potential. Remestemcel-L, an ex-vivo culture-expanded adult human MSC  
411 suspension for intravenous infusion, which has received positive recommendations from the FDA for  
412 steroid-refractory acute graft-versus-host disease in pediatric patients based on an open-label study  
413 compared to historical controls [57]. The novel delivery approach described here could potentially  
414 reduce risk of clot formation from IV administered MSCs, making treatment potentially safer and more  
415 controlled than direct infusion.

## 416 **Conclusion**

417 We conclude that immobilization of MSCs in a hollow fiber filter contributes to a reduced clot initiation  
418 potential relative to directly injected MSCs. Further removal of cellular byproducts through saline  
419 flushing of the bioreactor further reduces the MSC based clot formation potential. Additional heparin

420 does not appear to be required to maintain a designated ACT value relative to acellular perfusion  
421 circuits. Taken together, combined integration of these approaches may make MSC therapies which  
422 require systemic MSC exposure at less risk for coagulation-related events for a larger population,  
423 including the hypercoagulable.

424

#### 425 **Disclosures of Potential Conflicts of Interest**

426 The opinions or assertions contained herein are the private views of the author and are not to  
427 be construed as official or as reflecting the views of the Department of the Army or the  
428 Department of Defense.

429 JB and AC are United States government employees with no financial disclosures relevant to  
430 this publication.

431 BOR, SN, AT, RNB are employees and equity shareholders of Sentien Biotechnologies. BP is  
432 an equity shareholder and inventor of the technology with licensed patents to Sentien for  
433 commercialization.

#### 434 *Funding*

435 This research was conducted with private funding.

436

#### 437 **Data Availability Statement**

438 The data that support the findings of this study are available from the corresponding author  
439 upon reasonable request.

440

441

442 **References**

- 443 [1] Liu L, Wong CW, Han M, Farhoodi HP, Liu G, Liu Y, et al. Meta-analysis of preclinical studies of  
444 mesenchymal stromal cells to treat rheumatoid arthritis. *EBioMedicine* 2019;47:563-77.
- 445 [2] Beegle JR, Magner NL, Kalomoiris S, Harding A, Zhou P, Nacey C, et al. Preclinical evaluation of  
446 mesenchymal stem cells overexpressing VEGF to treat critical limb ischemia. *Molecular therapy Methods*  
447 *& clinical development* 2016;3:16053.
- 448 [3] Huang YZ, Gou M, Da LC, Zhang WQ, Xie HQ. Mesenchymal Stem Cells for Chronic Wound Healing:  
449 Current Status of Preclinical and Clinical Studies. *Tissue engineering Part B, Reviews* 2020.
- 450 [4] Torres Crigna A, Daniele C, Gamez C, Medina Balbuena S, Pastene DO, Nardozi D, et al. Stem/Stromal  
451 Cells for Treatment of Kidney Injuries With Focus on Preclinical Models. *Frontiers in medicine*  
452 2018;5:179.
- 453 [5] Parekkadan B, Milwid JM. Mesenchymal stem cells as therapeutics. *Annual review of biomedical*  
454 *engineering* 2010;12:87-117.
- 455 [6] Chamberlain G, Fox J, Ashton B, Middleton J. Concise review: mesenchymal stem cells: their  
456 phenotype, differentiation capacity, immunological features, and potential for homing. *Stem cells*  
457 (Dayton, Ohio) 2007;25:2739-49.
- 458 [7] Uccelli A, Moretta L, Pistoia V. Mesenchymal stem cells in health and disease. *Nature reviews*  
459 *Immunology* 2008;8:726-36.
- 460 [8] Hoogduijn MJ, Lombardo E. Mesenchymal Stromal Cells Anno 2019: Dawn of the Therapeutic Era?  
461 Concise Review. *Stem cells translational medicine* 2019;8:1126-34.
- 462 [9] Sánchez-Guijo F, García-Arranz M, López-Parra M, Monedero P, Mata-Martínez C, Santos A, et al.  
463 Adipose-derived mesenchymal stromal cells for the treatment of patients with severe SARS-CoV-2  
464 pneumonia requiring mechanical ventilation. A proof of concept study: *EClinicalMedicine*. 2020 Jul  
465 10:100454. doi: 10.1016/j.eclinm.2020.100454.
- 466 [10] M T. Mesoblast's Stem Cell Therapy Shows 83% Survival in Ventilator-Dependent COVID-19  
467 Patients. *BioSpace2020*.
- 468 [11] Coppin L, Sokal E, Stéphenne X. Thrombogenic Risk Induced by Intravascular Mesenchymal Stem  
469 Cell Therapy: Current Status and Future Perspectives. *Cells* 2019;8.
- 470 [12] Silachev DN, Goryunov KV, Shpilyuk MA, Beznoschenko OS, Morozova NY, Kraevaya EE, et al. Effect  
471 of MSCs and MSC-Derived Extracellular Vesicles on Human Blood Coagulation. *Cells* 2019;8.
- 472 [13] Jung JW, Kwon M, Choi JC, Shin JW, Park IW, Choi BW, et al. Familial occurrence of pulmonary  
473 embolism after intravenous, adipose tissue-derived stem cell therapy. *Yonsei medical journal*  
474 2013;54:1293-6.
- 475 [14] Moll G, Rasmusson-Duprez I, von Bahr L, Connolly-Andersen AM, Elgue G, Funke L, et al. Are  
476 therapeutic human mesenchymal stromal cells compatible with human blood? *Stem cells (Dayton, Ohio)*  
477 2012;30:1565-74.
- 478 [15] Mackman N. The role of tissue factor and factor VIIa in hemostasis. *Anesthesia and analgesia*  
479 2009;108:1447-52.
- 480 [16] Christy BA, Herzig MC, Montgomery RK, Delavan C, Bynum JA, Reddoch KM, et al. Procoagulant  
481 activity of human mesenchymal stem cells. *The journal of trauma and acute care surgery* 2017;83:S164-  
482 s9.
- 483 [17] George MJ, Prabhakara K, Toledano-Furman NE, Wang YW, Gill BS, Wade CE, et al. Clinical Cellular  
484 Therapeutics Accelerate Clot Formation. *Stem cells translational medicine* 2018;7:731-9.
- 485 [18] Chance TC, Rathbone CR, Kamucheka RM, Peltier GC, Cap AP, Bynum JA. The effects of cell type and  
486 culture condition on the procoagulant activity of human mesenchymal stromal cell-derived extracellular  
487 vesicles. *The journal of trauma and acute care surgery* 2019;87:S74-s82.

- 488 [19] Lentz BR. Exposure of platelet membrane phosphatidylserine regulates blood coagulation. *Progress*  
489 *in lipid research* 2003;42:423-38.
- 490 [20] Israels SJ, Rand ML, Michelson AD. Neonatal platelet function. *Seminars in thrombosis and*  
491 *hemostasis* 2003;29:363-72.
- 492 [21] Spronk HM, ten Cate H, van der Meijden PE. Differential roles of tissue factor and  
493 phosphatidylserine in activation of coagulation. *Thrombosis research* 2014;133 Suppl 1:S54-6.
- 494 [22] Morrissey JH. Tissue factor: a key molecule in hemostatic and nonhemostatic systems. *International*  
495 *journal of hematology* 2004;79:103-8.
- 496 [23] Moll G, Drzeniek N, Kamhieh-Milz J, Geissler S, Volk HD, Reinke P. MSC Therapies for COVID-19:  
497 Importance of Patient Coagulopathy, Thromboprophylaxis, Cell Product Quality and Mode of Delivery  
498 for Treatment Safety and Efficacy. *Frontiers in immunology* 2020;11:1091.
- 499 [24] Tang N, Li D, Wang X, Sun Z. Abnormal coagulation parameters are associated with poor prognosis  
500 in patients with novel coronavirus pneumonia. *Journal of thrombosis and haemostasis : JTH*  
501 2020;18:844-7.
- 502 [25] Zhang Y, Xiao M, Zhang S, Xia P, Cao W, Jiang W, et al. Coagulopathy and Antiphospholipid  
503 Antibodies in Patients with Covid-19. *The New England journal of medicine* 2020;382:e38.
- 504 [26] Klok FA, Kruip M, van der Meer NJM, Arbous MS, Gommers D, Kant KM, et al. Incidence of  
505 thrombotic complications in critically ill ICU patients with COVID-19. *Thrombosis research* 2020;191:145-  
506 7.
- 507 [27] François M, Copland IB, Yuan S, Romieu-Mourez R, Waller EK, Galipeau J. Cryopreserved  
508 mesenchymal stromal cells display impaired immunosuppressive properties as a result of heat-shock  
509 response and impaired interferon- $\gamma$  licensing. *Cytotherapy* 2012;14:147-52.
- 510 [28] Caplan H, Olson SD, Kumar A, George M, Prabhakara KS, Wenzel P, et al. Mesenchymal Stromal Cell  
511 Therapeutic Delivery: Translational Challenges to Clinical Application. *Frontiers in immunology*  
512 2019;10:1645.
- 513 [29] Ocansey DKW, Pei B, Yan Y, Qian H, Zhang X, Xu W, et al. Improved therapeutics of modified  
514 mesenchymal stem cells: an update. *Journal of translational medicine* 2020;18:42.
- 515 [30] Mennan C, Garcia J, Roberts S, Hulme C, Wright K. A comprehensive characterisation of large-scale  
516 expanded human bone marrow and umbilical cord mesenchymal stem cells. *Stem cell research &*  
517 *therapy* 2019;10:99.
- 518 [31] Giri J, Galipeau J. Mesenchymal stromal cell therapeutic potency is dependent upon viability, route  
519 of delivery, and immune match. *Blood advances* 2020;4:1987-97.
- 520 [32] Allen A, Vaninov N, Li M, Nguyen S, Singh M, Igo P, et al. Mesenchymal Stromal Cell Bioreactor for  
521 Ex Vivo Reprogramming of Human Immune Cells. *Scientific reports* 2020;10:10142.
- 522 [33] Trevisan BM, Porada CD, Atala A, Almeida-Porada G. Microfluidic devices for studying coagulation  
523 biology. *Seminars in cell & developmental biology* 2020.
- 524 [34] Tilley D, Levit I, Samis JA. Development of a microplate coagulation assay for Factor V in human  
525 plasma. *Thrombosis journal* 2011;9:11.
- 526 [35] Suidan GL, Singh PK, Patel-Hett S, Chen ZL, Volfson D, Yamamoto-Imoto H, et al. Abnormal clotting  
527 of the intrinsic/contact pathway in Alzheimer disease patients is related to cognitive ability. *Blood*  
528 *advances* 2018;2:954-63.
- 529 [36] Gleeson BM, Martin K, Ali MT, Kumar AH, Pillai MG, Kumar SP, et al. Bone Marrow-Derived  
530 Mesenchymal Stem Cells Have Innate Procoagulant Activity and Cause Microvascular Obstruction  
531 Following Intracoronary Delivery: Amelioration by Antithrombin Therapy. *Stem cells (Dayton, Ohio)*  
532 2015;33:2726-37.
- 533 [37] Liao L, Shi B, Chang H, Su X, Zhang L, Bi C, et al. Heparin improves BMSC cell therapy: Anticoagulant  
534 treatment by heparin improves the safety and therapeutic effect of bone marrow-derived mesenchymal  
535 stem cell cytototherapy. *Theranostics* 2017;7:106-16.

- 536 [38] Coppin L, Najimi M, Bodart J, Rouchon MS, van der Smissen P, Eeckhoudt S, et al. Clinical Protocol to  
537 Prevent Thrombogenic Effect of Liver-Derived Mesenchymal Cells for Cell-Based Therapies. *Cells* 2019;8.  
538 [39] Cronin RE, Reilly RF. Unfractionated heparin for hemodialysis: still the best option. *Seminars in*  
539 *dialysis* 2010;23:510-5.
- 540 [40] Galipeau J, Sensébé L. Mesenchymal Stromal Cells: Clinical Challenges and Therapeutic  
541 Opportunities. *Cell stem cell* 2018;22:824-33.
- 542 [41] Moll G, Ankrum JA, Kamhieh-Milz J, Bieback K, Ringdén O, Volk HD, et al. Intravascular  
543 Mesenchymal Stromal/Stem Cell Therapy Product Diversification: Time for New Clinical Guidelines.  
544 *Trends in molecular medicine* 2019;25:149-63.
- 545 [42] Lalu MM, McIntyre L, Pugliese C, Fergusson D, Winston BW, Marshall JC, et al. Safety of cell therapy  
546 with mesenchymal stromal cells (SafeCell): a systematic review and meta-analysis of clinical trials. *PloS*  
547 *one* 2012;7:e47559.
- 548 [43] Yong KW, Choi JR, Wan Safwani WK. Biobanking of Human Mesenchymal Stem Cells: Future  
549 Strategy to Facilitate Clinical Applications. *Advances in experimental medicine and biology* 2016;951:99-  
550 110.
- 551 [44] Kabat M, Bobkov I, Kumar S, Grumet M. Trends in mesenchymal stem cell clinical trials 2004-2018:  
552 Is efficacy optimal in a narrow dose range? *Stem cells translational medicine* 2020;9:17-27.
- 553 [45] Börger V, Weiss DJ, Anderson JD, Borràs FE, Bussolati B, Carter DRF, et al. ISEV and ISCT statement  
554 on EVs from MSCs and other cells: considerations for potential therapeutic agents to suppress COVID-  
555 19. *Cytotherapy* 2020;22:482-5.
- 556 [46] Godoy JAP, Paiva RMA, Souza AM, Kondo AT, Kutner JM, Okamoto OK. Clinical Translation of  
557 Mesenchymal Stromal Cell Therapy for Graft Versus Host Disease. *Frontiers in cell and developmental*  
558 *biology* 2019;7:255.
- 559 [47] Elgaz S, Kuçi Z, Kuçi S, Bönig H, Bader P. Clinical Use of Mesenchymal Stromal Cells in the Treatment  
560 of Acute Graft-versus-Host Disease. *Transfusion medicine and hemotherapy : offzielles Organ der*  
561 *Deutschen Gesellschaft fur Transfusionsmedizin und Immunhamatologie* 2019;46:27-34.
- 562 [48] Horbett TA. Fibrinogen adsorption to biomaterials. *Journal of biomedical materials research Part A*  
563 2018;106:2777-88.
- 564 [49] Biran R, Pond D. Heparin coatings for improving blood compatibility of medical devices. *Advanced*  
565 *drug delivery reviews* 2017;112:12-23.
- 566 [50] Maul TM MM, Wearden PD. ECMO biocompatibility: surface coatings, anticoagulation, and  
567 coagulation monitoring. *Extracorporeal Membrane Oxygenation-Advances in Therapy:*  
568 *InTechOpen*2016.
- 569 [51] Nilsson B, Korsgren O, Lambris JD, Ekdahl KN. Can cells and biomaterials in therapeutic medicine be  
570 shielded from innate immune recognition? *Trends in immunology* 2010;31:32-8.
- 571 [52] Antebi B, Asher AM, Rodriguez LA, 2nd, Moore RK, Mohammadipoor A, Cancio LC. Cryopreserved  
572 mesenchymal stem cells regain functional potency following a 24-h acclimation period. *Journal of*  
573 *translational medicine* 2019;17:297.
- 574 [53] Moll G, Alm JJ, Davies LC, von Bahr L, Heldring N, Stenbeck-Funke L, et al. Do cryopreserved  
575 mesenchymal stromal cells display impaired immunomodulatory and therapeutic properties? *Stem cells*  
576 *(Dayton, Ohio)* 2014;32:2430-42.
- 577 [54] Szamosfalvi B, Yessayan L. Innovations in CKRT: individualized therapy with fewer complications.  
578 *Nature reviews Nephrology* 2020;16:560-1.
- 579 [55] Liang B, Chen J, Li T, Wu H, Yang W, Li Y, et al. Clinical remission of a critically ill COVID-19 patient  
580 treated by human umbilical cord mesenchymal stem cells: A case report. *Medicine* 2020;99:e21429.
- 581 [56] Leng Z, Zhu R, Hou W, Feng Y, Yang Y, Han Q, et al. Transplantation of ACE2(-) Mesenchymal Stem  
582 Cells Improves the Outcome of Patients with COVID-19 Pneumonia. *Aging and disease* 2020;11:216-28.

583 [57] Limited M. U.S. FDA Advisory Committee Votes Nine to One in Favor of Remestemcel-L (Ryoncil™)  
584 for Efficacy in Children With Steroid-Refractory Acute Graft Versus Host Disease. GlobeNewswire2020.

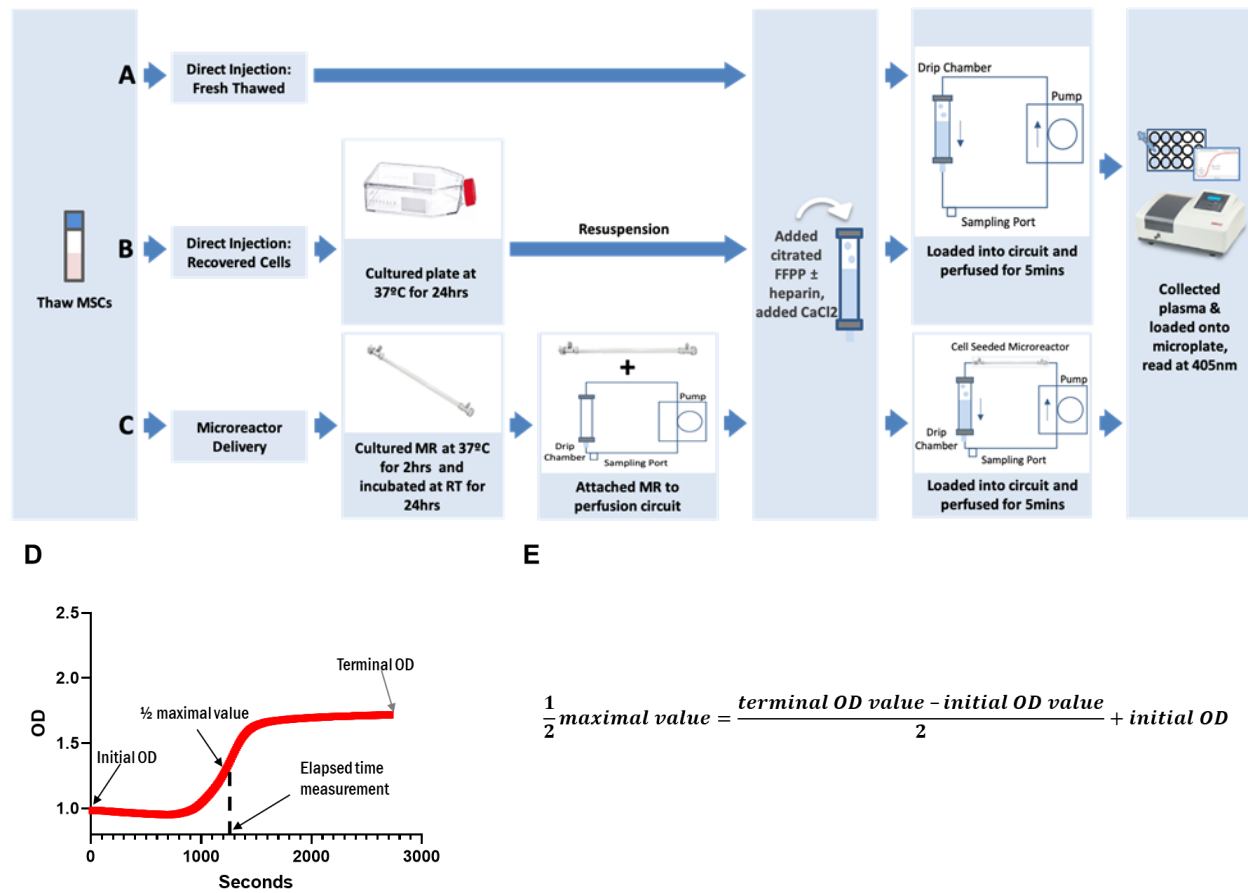

**Figure 1. Clot Formation Assay Experimental Setup.** MSCs were thawed from cryopreservation and were either **(A)** immediately combined into fresh-frozen pooled plasma-based (FFPP), perfused in the circuit and read, **(B)** cultured for 24 hours then resuspended into FFPP, perfused in the circuit and read, or **(C)** seeded into micro bioreactors (MR), allowed to attach to the hollow-fiber filters for 2 hours, room temperature incubated for 24 hours then attached to perfusion circuits loaded with FFPP, perfused and read. Perfusion of the MR circuits lasted 5 minutes before samples were collected and read on the spectrophotometer at 405nm to assess fibrin formation. **(D)** Resulting spectrophotometric optical density (OD) readouts were graphed over time. **(E)** Formula used for the calculation of the clot formation time determined at the 1/2 maximal value.



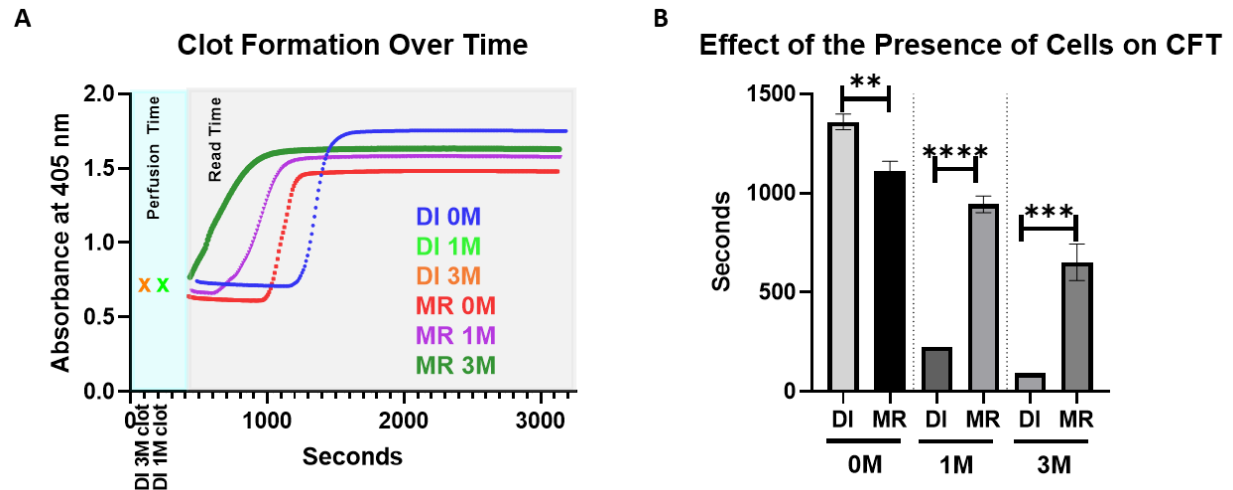

**Figure 2. Increased MSC Exposure Shortens Clot Formation Time.** 0,  $1 \times 10^6$ , or  $3 \times 10^6$  viable MSCs were isolated for inclusion in each respective group. Freshly thawed MSCs were used in direct injection (DI) groups. MSCs used in MR groups were first incubated for 2 hours at 37 °C followed by a 24 hour hold at room temperature prior to perfusion. After each groups' cells were prepared warmed fresh frozen pooled plasma was perfused through circuit for 5 minutes then subjected to spectrophotometric measurements. **(A)** Measurements of fibrin clot formation in plasma were made every 10 seconds over a 45-minute period (grey shaded region) following 5 minutes of perfusion (aqua shaded region). Groups which clotted during perfusion are designated with an 'x' at the time at which the clot was noted to be visibly obstructing perfusion. As clots formed, absorbance increased resulting in the designated curves. **(B)** Values for CFT were determined. Resulting values were graphed and analyzed with an unpaired student's t-test. N=3 runs per group. \*\*= $p < 0.005$ ; \*\*\*= $p = 0.0005$ ; \*\*\*\*= $p < 0.0001$ . Error bars represent  $\pm$  standard deviation. DI = direct injection

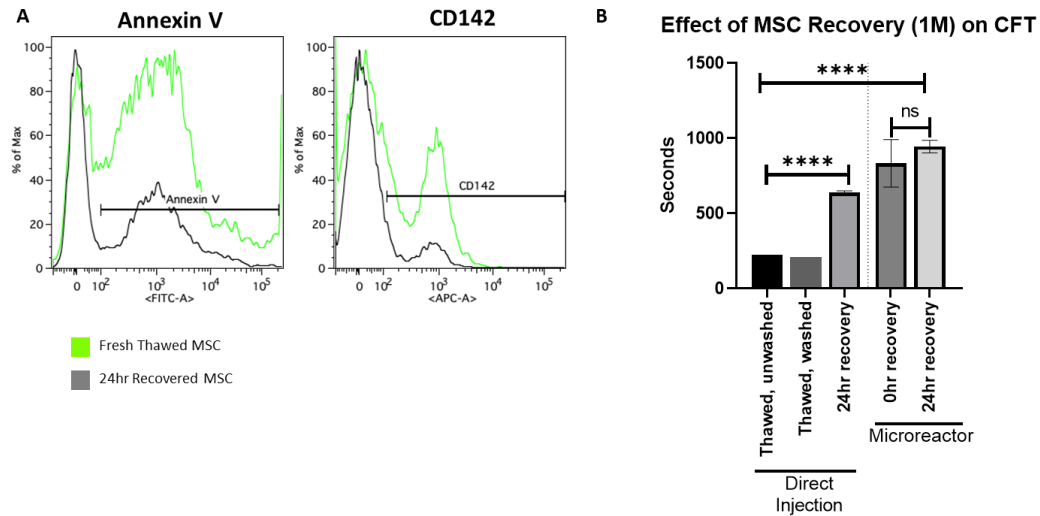

**Figure 3. The Effect of Cell Washing and Cell Recovery on CFT.**  $1 \times 10^6$  viable MSCs were isolated for inclusion in each respective group. Recovered cells were cultured for 24 hours and dissociated from the culture plate immediately prior to use. **(A)** Cells collected immediately after thaw and cells collected after recovery were subjected to staining and flow cytometry. Each curve represents the outcome of 3 pooled samples. **(B)** Direct injection groups were either thawed directly into plasma, washed with saline, or recovered with 24 hrs of culture at 37 °C. Microreactor groups were seeded with MSCs and either immediately used or allowed to attach for 2 hours at 37 °C followed by a 24 hour hold at room temperature prior to perfusion. Values for CFT were determined and resulting values were graphed and analyzed with an unpaired student's t-test. N=3 runs per group. \*\*\*\*=  $p < 0.0001$ . Error bars represent  $\pm$  standard deviation.

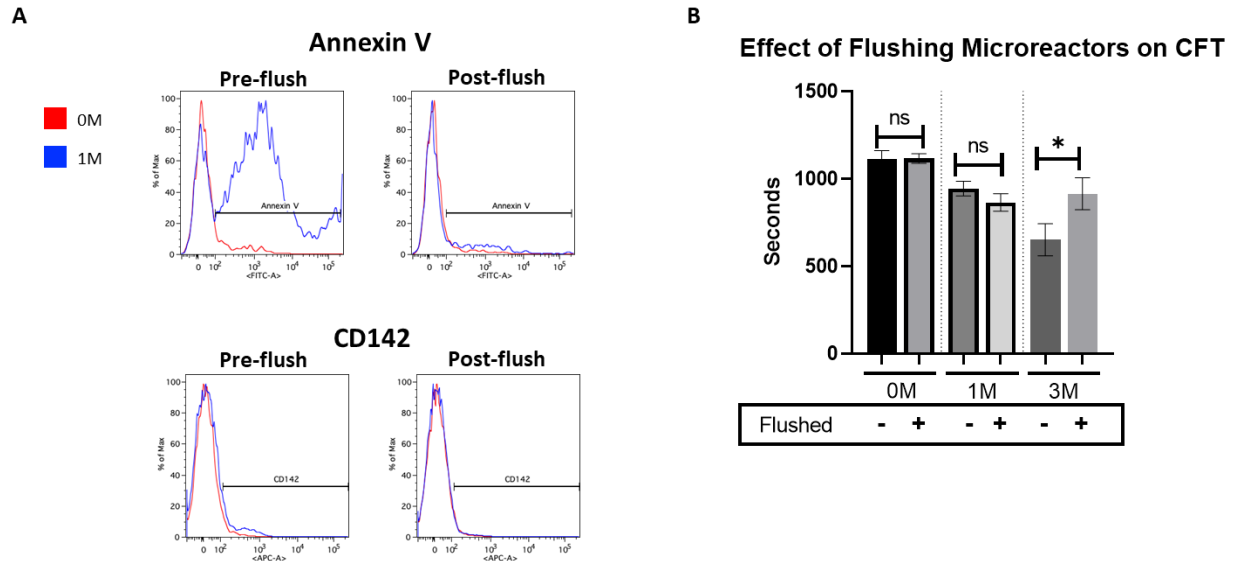

**Figure 4. Flushing of Soluble Factors Affects CFT.** Microreactors were seeded with MSCs and allowed to attach for 2 hours at 37 °C followed by a 24 hour hold at room temperature. **(A)** Samples taken from the extracapillary space of microreactors with either 0 or 1 x 10<sup>6</sup> MSCs, both pre- and post-flushing of the device, were subjected to staining and flow cytometry for known pro-coagulation markers phosphatidylserine (Annexin V) and tissue factor (CD142). Each curve represents the outcome of 3 pooled samples. **(B)** Warmed fresh frozen pooled plasma was perfused through circuits with either 0, 1 or 3 x 10<sup>6</sup> viable MSCs (with and without a flushing procedure) for 5 minutes then subjected to spectrophotometric measurements. Measurements of fibrin clot formation in plasma were then made every 10 seconds over a 45-minute period. Values for CFT were determined and values were graphed and analyzed with an unpaired student's t-test. N≥2 runs per group. \*= p< 0.05. Error bars represent ± standard deviation.

## Effect of Heparin (1.5 U/mL) on CFT

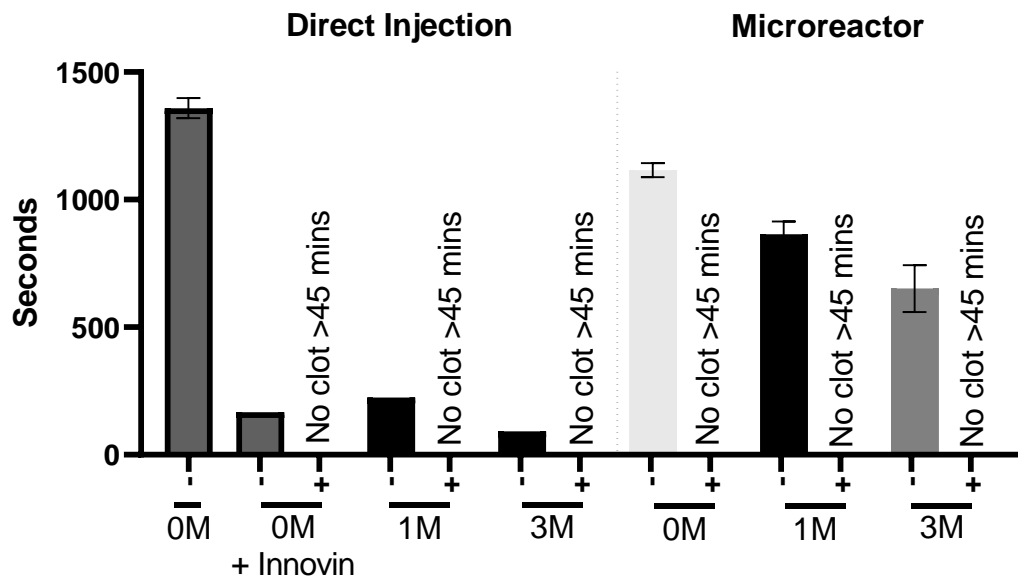

**Figure 5. Effect of Heparin on CFT.** 0,  $1 \times 10^6$ , or  $3 \times 10^6$  (0M, 1M, 3M) viable MSCs were isolated for inclusion in each respective group. MSCs for direct injection groups were thawed directly into plasma then used, while microreactor groups were seeded with MSCs and allowed to attach for 2 hours at 37 °C followed by a 24 hour hold at room temperature prior to perfusion. Innovin (thromboplastin) was added to the 0M group as a positive control. After each groups' cells were prepared, warmed FFPP was perfused through circuit for 5 minutes then subjected to spectrophotometric measurements. Measurements of fibrin clot formation in plasma were made every 10 seconds over a 45-minute period. Values for CFT were determined and resulting values were graphed and analyzed with an unpaired student's t-test. Samples which showed no increase in absorbance through the course of the experiment were designated to have not clotted.  $N \geq 2$  runs per group. \* =  $p < 0.05$ . Error bars represent  $\pm$  standard deviation.

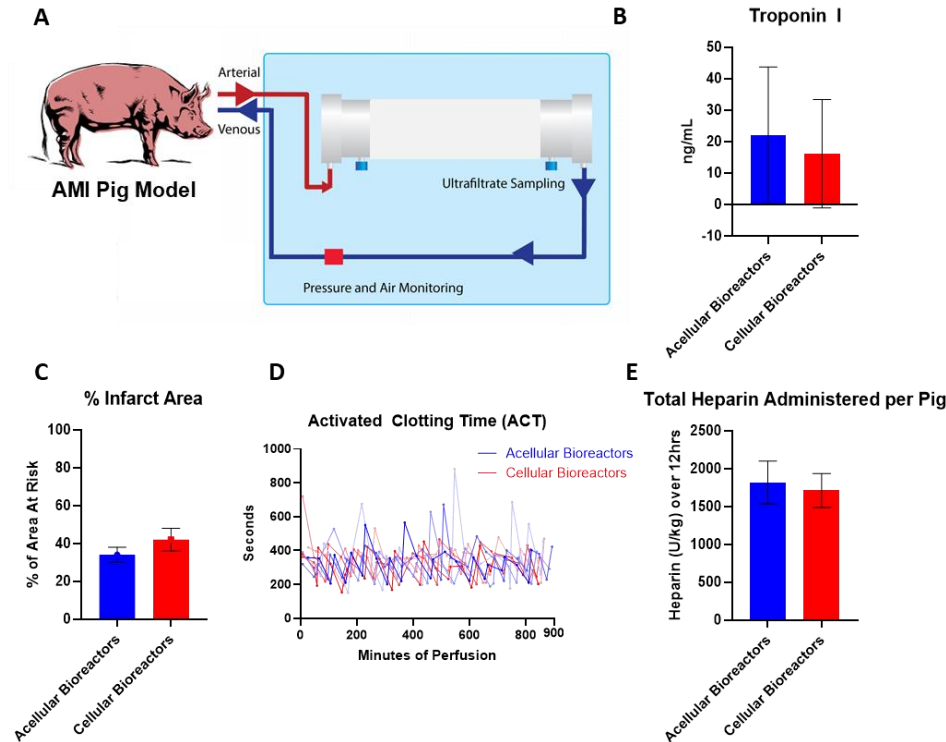

**Figure 6. Pig AMI Model Perfusion.** (A) Pigs were sedated, occluded of their left anterior descending coronary artery, re-perfused for 1 hour, and administered the designated bioreactor (acellular or cellular) for 12 hours of perfusion. (B,C) Comparative measurements of induced stress were done through serum sampling of Troponin I levels at the 12 hour mark, as well as morphological analysis of % infarct area at sacrifice. (D,E) Heparin was administered over the course of 12 hours to maintain an ACT of approximately 300 seconds. N=4 pigs per group. Error bars represent  $\pm$  standard deviation.
